# Supplementary material for: Self-Perceived Impact of COVID-19 Pandemic by Dental Students in Bucharest
Source: MDPI journal article supplement (doi:10.3390/ijerph18105249), 2021-05-14
Supplement: s1 [file s1]

**Table S1.** Questionnaire on the level of psychological and educational impact of the COVID-19 pandemic on dental students

| Question | Abbreviation     | Questions, Response Scale and Romanian Translations ( <i>italic</i> )                                          |                                                                                                                   |
|----------|------------------|----------------------------------------------------------------------------------------------------------------|-------------------------------------------------------------------------------------------------------------------|
| Q1       | Age              | Age                                                                                                            | <i>Vârsta</i>                                                                                                     |
| Q2       | Sex              | Sex                                                                                                            | <i>Sexul</i>                                                                                                      |
|          |                  | 1. Male<br>2. Female<br>3. Other                                                                               | 1. Masculin<br>2. Feminin<br>3. Alul                                                                              |
| Q3       | Leaving alone    | You live alone?                                                                                                | <i>Locuiți singur?</i>                                                                                            |
|          |                  | 1. Yes<br>2. No                                                                                                | 1. Da<br>2. Nu                                                                                                    |
| Q4       | Year of study    | Year of study                                                                                                  | <i>Anul de studiu</i>                                                                                             |
|          |                  | 1. I<br>2. II<br>3. III<br>4. IV<br>5. V<br>6. VI                                                              |                                                                                                                   |
| Q5       | Level of stress  | How do you assess the level of stress you feel as a result of the COVID-19 pandemic?                           | <i>Cum evaluați nivelul de stres pe care îl simțiți ca urmare a pandemiei COVID-19?</i>                           |
|          |                  | 1. Non - existent<br>2. Very low<br>3. Low<br>4. High<br>5. Very high                                          | 1. Inexistent<br>2. Foarte scăzut<br>3. Scăzut<br>4. Crescut<br>5. Foarte crescut                                 |
| Q6       | Anxiety          | How do you assess the anxiety feeling related to a possible infection with SarsCov-2?                          | <i>Cum apreciați sentimentul de anxietate legat de o posibilă infecție cu SarsCov-2?</i>                          |
|          |                  | 1. Non - existent<br>2. Very low<br>3. Low<br>4. High<br>5. Very high                                          | 1. Inexistent<br>2. Foarte scăzut<br>3. Scăzut<br>4. Crescut<br>5. Foarte crescut                                 |
| Q7       | Sleep quality    | How do you assess the change in sleep quality during the COVID-19 pandemic?                                    | <i>Cum apreciați modificarea calității somnului în timpul pandemiei de COVID-19?</i>                              |
|          |                  | 1. Non-existent<br>2. Very low<br>3. Low<br>4. High<br>5. Very high                                            | 1. Inexistent<br>2. Foarte scăzut<br>3. Scăzut<br>4. Crescut<br>5. Foarte crescut                                 |
| Q8       | Study motivation | How do you appreciate the motivation for individual study compared to the period before the COVID-19 pandemic? | <i>Cum apreciați motivația pentru studiul individual în comparație cu perioada anterioară pandemiei COVID-19?</i> |
|          |                  | 1. No affect<br>2. Minor affect<br>3. Neutral<br>4. Moderate affect<br>5. Major affect                         | 1. Neafectată<br>2. Minim afectată<br>3. Opinie neutra<br>4. Moderat afectată<br>5. Foarte afectată               |

| Question | Abbreviation                    | Questions, Response Scale and Romanian Translations ( <i>italic</i> )                                                                                                                                                          |                                                                                                                                                                                                             |
|----------|---------------------------------|--------------------------------------------------------------------------------------------------------------------------------------------------------------------------------------------------------------------------------|-------------------------------------------------------------------------------------------------------------------------------------------------------------------------------------------------------------|
| Q9       | Academic learning               | How do you appreciate your own level of acquiring of academic information through the online teaching system?                                                                                                                  | <i>Cum apreciați, din punctul dvs. de vedere, însusirea informației academice prin intermediul sistemului de predare online?</i>                                                                            |
|          |                                 | 1. Non - existent<br>2. Very low<br>3. Low<br>4. High<br>5. Very high                                                                                                                                                          | 1. <i>Inexistentă</i><br>2. <i>Foarte scăzută</i><br>3. <i>Scăzut</i><br>4. <i>Crescută</i><br>5. <i>Foarte crescută</i>                                                                                    |
| Q10      | Academic teaching               | How do you evaluate the efficiency of teachers in transmitting theoretical and practical information in online teaching courses?                                                                                               | <i>Cum evaluați eficiența cadrelor didactice în transmiterea informațiilor teoretice și practice în cursurile de predare online?</i>                                                                        |
|          |                                 | 1. Very low<br>2. Low<br>3. Neutral<br>4. High<br>5. Very high                                                                                                                                                                 | 1. <i>Foarte scăzută</i><br>2. <i>Scăzută</i><br>3. <i>Opinie neutră</i><br>4. <i>Crescută</i><br>5. <i>Foarte crescută</i>                                                                                 |
| Q11      | Time for individual study       | How do you think the time allocated to the individual study has modified in your case, compared to the period before the COVID-19 pandemic?                                                                                    | <i>Cum credeți că s-a modificat timpul alocat studiului individual în cazul dvs., comparativ cu perioada anterioară pandemiei de COVID-19?</i>                                                              |
|          |                                 | 1. Not modified<br>2. Minor modified<br>3. Neutral<br>4. Moderate modified<br>5. Major modified                                                                                                                                | 1. <i>Nemodificat</i><br>2. <i>Minim modificat</i><br>3. <i>Opinie neutră</i><br>4. <i>Moderat modificat</i><br>5. <i>Major modificat</i>                                                                   |
| Q12      | Gain of practical skills        | In light of the COVID-19 pandemic, how much was your acquisition of practical skills regarding dental work affected, given that you normally would have been gained them from patients during traditional clinical activities? | <i>În lumina pandemiei de COVID-19, cum apreciați că va este afectată dobândirea abilităților practice, care ar fi fost învățate prin practica la pacient în timpul activităților clinice tradiționale?</i> |
|          |                                 | 1. No affect<br>2. Minor affect<br>3. Neutral<br>4. Moderate affect<br>5. Major affect                                                                                                                                         | 1. <i>Neafectată</i><br>2. <i>Minim afectată</i><br>3. <i>Opinie neutră</i><br>4. <i>Moderat afectată</i><br>5. <i>Major afectată</i>                                                                       |
| Q13      | Future professional perspective | How do you evaluate the impact of this period on the profession of dentist in the future?                                                                                                                                      | <i>Cum evaluați impactul acestei perioade asupra profesiei de medic dentist în viitor?</i>                                                                                                                  |
|          |                                 | 1. Non-existent<br>2. Very low<br>3. Low<br>4. High<br>5. Very high                                                                                                                                                            | 1. <i>Inexistent</i><br>2. <i>Foarte scăzut</i><br>3. <i>Scăzut</i><br>4. <i>Crescut</i><br>5. <i>Foarte crescut</i>                                                                                        |
